# Supplementary material for: Health status of Polychrus gutturosus based on physical examination, hematology and biochemistry parameters in Costa Rica
Source: PeerJ. 2021 Jan 6;9:e10649. doi: 10.7717/peerj.10649 (PMC7796665; doi:10.7717/peerj.10649)
Supplement: Supplemental Information 2 [file peerj-09-10649-s002.xlsx]

## Sheet: Hoja1
N°	Date	Tag	Cloaca_T	Skin_T	Sex	SVL	Weight	pcv %	rbc	wbc	tc	heterophils %	heterophils	lymphocytes%	lymphocytes	monocytes%	monocytes	eosinophils%	eosinophils	basophils%	basophils	hemoparasites	glucose	pt	alb	glob	a/g	ast	ck	ca	p	ca:p	uric	cholest	Observaciones
1	2018-10-20	094	23	19.9	F	160	62	35	0.85	25.12	2.01	6	1.5072	76	19.0912	16	4.0192	2	0.5024	0	0	No	12.0435	79	18.56	60.44	0.307081	42.8	1672.3	3.11	2.05	1.51707	489.9	10.34
2	2018-10-20	088	21.6	18.8	M	126	39	35	1.01	13.06	1.005	21	2.7426	65	8.489	10	1.306	3	0.3918	0	0	No	13.0425	79	9.57	69.43	0.137837	139.4	6848.2	3.7	3.33	1.11111	246.3	9.09
3	2018-10-20	062	22.4	19.7	F	148	53	34	0.99	28.64	2.01	20	5.728	65	18.616	14	4.0096	2	0.5728	0	0	No	8.9355	81	24.01	56.99	0.421302	79.8	2271.6	4.08	2.47	1.65182	173	8.06
4	2018-10-20	121	21.2	19.1	M	131	44	40	0.89	27.63	1.005	9	2.4867	78	21.5514	8	2.2104	5	1.3815	0	0	Yes	13.209	81	24.02	56.98	0.421551	30.5	1284.3	3.62	1.76	2.05682	211.5	9.31
5	2018-10-20	140	22	19.9	M	121	37	44	1.29	34.67	3.01	13	4.5071	75	26.0025	12	4.1604	0	0	0	0	No	9.768	82	20.18	61.82	0.326432	106	3242.4	3.74	2.55	1.46667	96.8	12.63
6	2018-11-24	073	25.7	21	F	142	34	34	0.96	10.55	4.02	8	0.844	82	8.651	7	0.7385	3	0.3165	0	0	No	9.102	64	16.2	47.8	0.338912	24.7	566.8	3.05	1.8	1.69444	84.6	10.65
7	2018-11-24	129	25.2	20.9	F	136	37	32	1.08	17.59	2.01	13	2.2867	78	13.7202	6	1.0554	3	0.5277	0	0	Yes	14.0415	82	20.4	61.6	0.331169	49.6	4935.1	3.37	2.99	1.12709	159	17.5
8	2018-11-24	117	23.5	20.6	M	133	45	24	0.9	13.56	2.512	9	1.2204	79	10.7124	9	1.2204	3	0.4068	0	0	No	12.3765	70	11.02	58.98	0.186843	35.7	2602.6	2.85	2.35	1.21277	181.2	8.83
9	2018-11-24	091	24.1	20.6	M	128	40	30	0.95	12.06	2.01	9	1.0854	82	9.8892	6	0.7236	3	0.3618	0	0	Yes	9.7125	84	23.16	60.84	0.380671	38.8	3555.6	3.26	2.56	1.27344	531.9	11.36
10	2018-11-24	118	23.8	20.5	M	125	41	25	0.69	16.08	2.01	8	1.2864	82	13.1856	7	1.1256	2	0.3216	1	0.1608	Yes	12.099	72	8.7	63.3	0.137441	30.7	1104.9	2.56	1.6	1.6	223.9	11.63
11	2018-12-29	043	27.5	24	M	137	50	30	0.78	24.12	2.51	9	2.1708	86	20.7432	2	0.4824	2	0.4824	1	0.2412	No	12.8205	82	28.17	53.83	0.523314	40.3	931.3	3.06	2.3	1.33043	469.6	15.34
12	2018-12-29	128	25.3	23.6	M	135	52	25	1	26.13	3.01	14	3.6582	73	19.0749	8	2.0904	6	1.5678	0	0	No	8.3805	84	26.18	57.82	0.452785	44.9	475.8	3.26	1.8	1.81111	398.5	8.19
13	2018-12-29	089	24.9	21.3	F	174	51	32	1.31	24.62	2.51	20	4.924	69	16.9878	7	1.7234	4	0.9848	0	0	Yes	11.5995	86	16.8	69.2	0.242775	22.1	1032.1	2.97	2	1.485	94.5	5.58
14	2018-12-29	099	25.5	21.8	F	143	47	35	0.73	18.09	2.51	15	2.7135	79	14.2911	2	0.3618	3	0.5427	1	0.1809	No	11.544	78	22.37	55.63	0.402121	33.5	512.3	3.3	2.59	1.27413	482.4	9.93	Muestra de heces
15	2018-12-29	085	23.8	21.6	F	171	58	30	1	18.09	3.51	21	3.7989	73	13.2057	3	0.5427	3	0.5427	0	0	No	9.546	68	16.83	51.17	0.328904	19.2	1111	9.35	5.49	1.7031	93.3	10.61	Muestra de heces
16	2018-12-29	125	24.1	22	F	144	52	34	0.69	18.59	2.01	12	2.2308	80	14.872	3	0.5577	5	0.9295	1	0.1859	No	11.655	74	17.81	56.19	0.31696	29.6	440.4	2.99	2.01	1.48756	250.7	9.3
17	2019-02-02	120	32.4	23.6	F	165	65	30	1.22	20.6	3.01	18	3.708	62	12.772	13	2.678	5	1.03	2	0.412	Yes	11.766	76	15.18	60.82	0.249589	20.2	122.9	2.96	1.96	1.5102	210.1	8.65
18	2019-02-02	068	25.4	23.7	M	127	37	24	1.1	26.63	1.51	8	2.1304	83	22.1029	7	1.8641	2	0.5326	0	0	Yes	11.877	66	6.04	59.96	0.100734	22.4	967.3	3.16	2.26	1.39823	86	6.5
19	2019-02-02	109	26.3	24	F	145	47	35	1.34	14.57	4.52	14	2.0398	67	9.7619	12	1.7484	6	0.8742	1	0.1457	No	14.1525	68	17.73	50.27	0.352695	20.4	512.7	3.33	2	1.665	93.1	7.14
20	2019-02-02	135	26.6	23.1	F	118	27	32	0.65	13.56	3.51	11	1.4916	80	10.848	5	0.678	3	0.4068	1	0.1356	No	12.876	64	4.09	59.91	0.0682691	40.6	1180.7	2.67	2.65	1.00755	68.8	8.34
21	2019-02-02	106	26	23.9	M	104.5	21	36	1.35	19.09	1.01	11	2.0999	76	14.5084	6	1.1454	5	0.9545	1	0.1909	No	9.7125	60	10.74	49.26	0.218027	21.9	1192.5	2.91	2.54	1.14567	66.5	7.14
22	2019-02-02	053	26.8	21.1	M	133.5	40	37	0.87	18.59	4.52	10	1.859	67	12.4553	17	3.1603	7	1.3013	0	0	No	11.1	78	16.66	61.34	0.271601	35.5	359.5	3.19	1.88	1.69681	150.4	8.36
23	2019-02-02	114	26.3	23.6	M	135.5	42	33	0.84	18.59	4.02	11	2.0449	75	13.9425	11	2.0449	1	0.1859	2	0.3718	No	13.764	68	11.71	56.29	0.20803	41.3	971.2	2.77	2.08	1.33173	132	5.37
24	2019-02-02	081	23	21.9	F	142.5	55	30	0.72	20.6	2.51	8	1.648	77	15.862	11	2.266	3	0.618	1	0.206	No	12.987	76	12.8	63.2	0.202532	22.2	1062.1	2.94	1.91	1.53927	536	9.3
25	2019-03-09	103	26	23.1	F	149	58	23	0.64	12.06	1.51	19	2.2914	76	9.1656	1	0.1206	4	0.4824	0	0	No	10.6005	62	3.7	58.3	0.0634648	43.7	2902.5	2.2	1.43	1.53846	230.3	5.39
26	2019-03-09	056	27.2	24.7	M	123	30	28	0.91	13.57	0.51	13	1.7641	76	10.3132	9	1.2213	2	0.2714	0	0	No	13.653	78	23.25	54.75	0.424658	26.1	875.2	3.41	2.83	1.20495	432.2	6.97
27	2019-03-09	105	27.3	26.2	M	125	30	30	1.11	22.51	1.51	11	2.4761	78	17.5578	5	1.1255	4	0.9004	2	0.4502	No	9.324	74	22.8	51.2	0.445312	18.5	874.7	6.56	1.89	3.4709	124.9	5.52	Muestra de heces (2)
28	2019-03-09	082	26.6	25.1	F	144	38	35	0.92	12.56	2.01	15	1.884	72	9.0432	6	0.7536	5	0.628	2	0.2512	No	10.9335	78	21.64	56.36	0.38396	22.1	585.1	3.81	2.32	1.64224	171	17.4
29	2019-03-09	077	26.8	25.5	M	131	42	24	0.65	24.12	1.05	29	6.9948	26	6.2712	42	10.1304	3	0.7236	0	0	Yes	8.9355	70	23.9	46.1	0.518438	34.6	954.5	3.27	1.65	1.98182	99.8	4.49
30	2019-03-09	130	27.1	23.4	M	123	34	30	1.03	37.18	0.51	15	5.577	73	27.1414	9	3.3462	3	1.1154	0	0	No	14.652	76	24.63	51.37	0.479463	27.6	347.6	3.27	2.8	1.16786	63.3	10.09
31	2019-04-13	122	27	22.6	F	163	65	30	0.73	8.04	3.51	20	1.608	73	5.8692	4	0.3216	4	0.3216	1	0.0804	No	12.2655	80	22.15	57.85	0.382887	19.2	537.2	7.93	5.12	1.54883	138	12.27
32	2019-04-13	092	26	22.9	M	113.5	26	30	0.67	14.58	0.21	14	2.0412	75	10.935	9	1.3122	2	0.2916	0	0	No	12.9315	62	14.56	47.44	0.306914	26.6	840.9	2.77	2.82	0.98227	291	6.88
33	2019-04-13	139	28.2	22.9	F	127.5	34	29	0.87	15.08	3.01	24	3.6192	62	9.3496	11	1.6588	3	0.4524	0	0	No	11.1	76	18.45	57.55	0.320591	36.9	1277.5	3.05	3.99	0.764411	1164.9	7.23
34	2019-04-13	059	26.6	23.2	M	104	17	30	0.93	20.6	1.05	12	2.472	82	16.892	5	1.03	0	0	0	0	No	13.764	66	10.75	55.25	0.19457	21.5	261.6	2.83	3.22	0.878882	63	5.46
35	2019-04-13	045	24.7	22.8	F	151	50	31	0.86	13.57	0.51	11	1.4927	82	11.1274	7	0.9499	0	0	0	0	No	16.095	68	16.28	51.72	0.314772	15.1	314	3.72	1.68	2.21429	59.3	9.95
36	2019-05-25	111	23.7	21.9	F	163	80	36	0.92	14.07	1.05	19	2.6733	67	9.4269	10	1.407	2	0.2814	2	0.2814	No	9.9345	88	20.75	67.25	0.30855	27.7	1200.2	7.31	2.48	2.94758	181.8	7.22
37	2019-05-25	076	24.4	22.9	M	129	40	34	1.19	17.08	2.01	18	3.0744	75	12.81	6	1.0248	0	0	1	0.1708	Yes	15.873	78	26.14	51.86	0.504049	23.8	130.1	3.38	2.33	1.45064	87.4	5.33
38	2019-05-25	070	23.8	21.7	F	166	71	33	0.79	16.58	1.05	9	1.4922	81	13.4298	8	1.3264	2	0.3316	0	0	No	14.319	86	25.02	60.98	0.410298	16.9	171.2	6.9	2.46	2.80488	60.4	9.14
39	2019-05-25	042	23.5	21.7	M	134	39	33	1.18	30.15	2.51	11	3.3165	87	26.2305	1	0.3015	0	0	2	0.603	No	15.5955	70	23.79	46.21	0.514824	25.6	721.2	3.02	1.67	1.80838	119.7	4.25
40	2019-05-25	101	23.7	21.7	F	145	61	38	1.11	25.12	1.05	13	3.2656	71	17.8352	9	2.2608	6	1.5072	1	0.2512	No	10.212	90	19.68	70.32	0.279863	25.2	393.2	6.75	2.73	2.47253	134.2	12.1

## Sheet: Hoja2
Polycromatophilic erithrocytes	rbc
2	0.85	Total/10
3	1.01	1000
0.8	0.99
1	0.89
1.2	1.29
1	0.96
1.4	1.08
0.4	0.9
0.6	0.95
1	0.69
2	0.78
0.8	1
1.2	1.31
1	0.73
2.2	1
2	0.69
1.6	1.22
1	1.1
2.2	1.34
0.8	0.65
3	1.35
0.8	0.87
0.6	0.84
0.4	0.72
0.8	0.64
1	0.91
2.4	1.11
1.2	0.92
0.8	0.65
1.2	1.03
1	0.73
1	0.67
2.4	0.87
0.8	0.93
1	0.86
0.6	0.92
2.2	1.19
1.2	0.79
1.6	1.18
2	1.11
1.33	mean
0.687694	SD
0.4	min
3	max
